# Supplementary material for: Overexpression of TFAM or Twinkle Increases mtDNA Copy Number and Facilitates Cardioprotection Associated with Limited Mitochondrial Oxidative Stress
Source: PubMed Central journal article supplement (PMC4379048; doi:10.1371/journal.pone.0119687), 2015-03-30

# S2 Fig. Perivascular fibrosis and cross-sectional area of myocytes in LV eight weeks after AVF creation

**A**

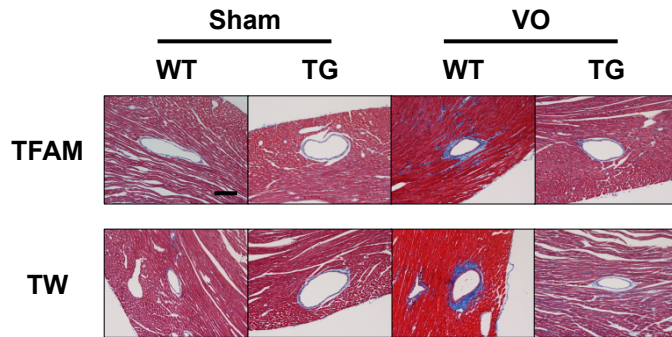

**B**

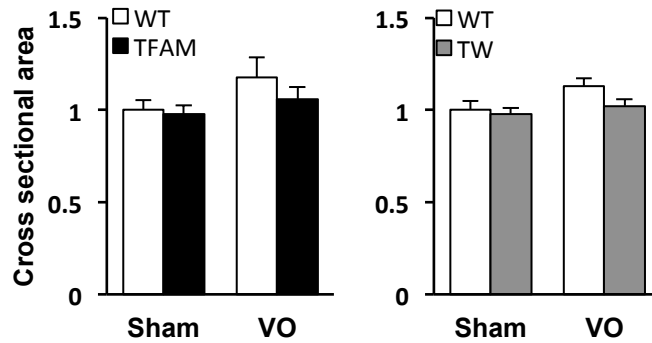

Supplement: pone.0119687.s002.pdf [file pone.0119687.s002.pdf]
