# Supplementary material for: Overexpression of TFAM or Twinkle Increases mtDNA Copy Number and Facilitates Cardioprotection Associated with Limited Mitochondrial Oxidative Stress
Source: PubMed Central journal article supplement (PMC4379048; doi:10.1371/journal.pone.0119687), 2015-03-30

# S5 Fig. Expression of mitochondrial scavenging enzymes in hTFAM-transgenic mice (TFAM mice) and Twinkle-transgenic mice (TW mice)

## A

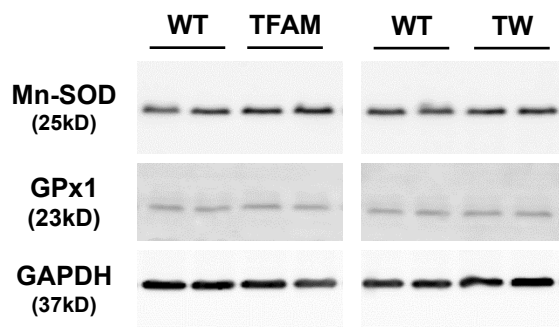

## B

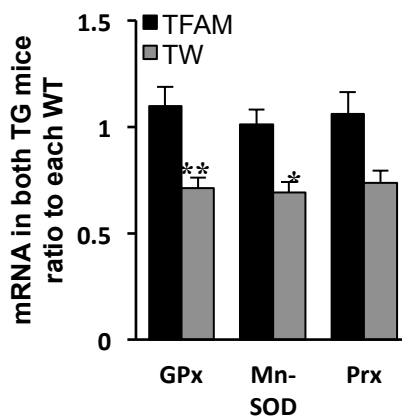

Supplement: pone.0119687.s005.pdf [file pone.0119687.s005.pdf]
