# Supplementary material for: Overexpression of TFAM or Twinkle Increases mtDNA Copy Number and Facilitates Cardioprotection Associated with Limited Mitochondrial Oxidative Stress
Source: PubMed Central journal article supplement (PMC4379048; doi:10.1371/journal.pone.0119687), 2015-03-30

# S6 Fig. Oxidized mtDNA extracted from mitochondria of TFAM mice and Twinkle (TW) mice at 8 weeks after creating arteriovenous fistula

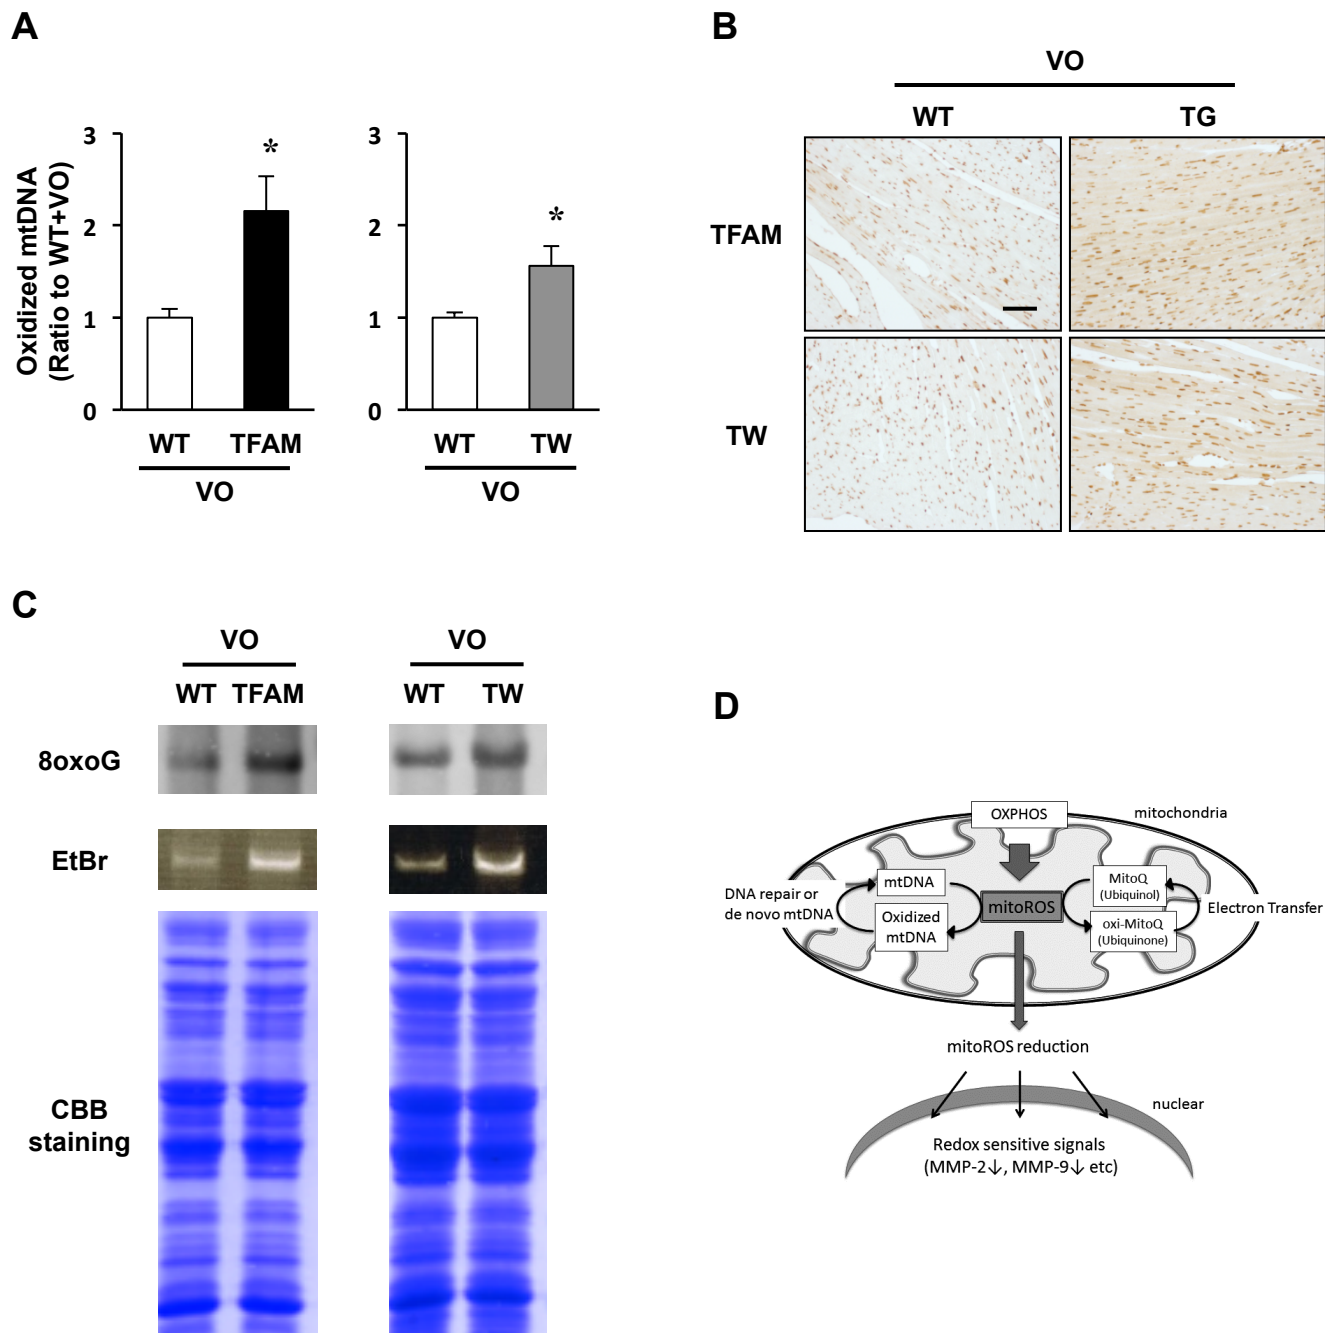

Supplement: pone.0119687.s006.pdf [file pone.0119687.s006.pdf]
