# Supplementary material for: Overexpression of TFAM or Twinkle Increases mtDNA Copy Number and Facilitates Cardioprotection Associated with Limited Mitochondrial Oxidative Stress
Source: PLoS One. 2015 Mar 30;10(3):e0119687. doi: 10.1371/journal.pone.0119687 (PMC4379048; doi:10.1371/journal.pone.0119687)
Supplement: S2 Table — TFAM, human mitochondrial transcription factor A-transgenic mice; TW, Twinkle-transgenic mice; WT, wild type mice; VO, volume overload; Sham, sham-operated; HR, heart rate; mAoP, mean aortic pressure; LVEDP, left ventricular end diastolic pressure. Data are expressed as mean ± SEM. *P < 0.05 vs. WT+Sham, **P < 0.01 vs. WT+Sham, † P < 0.01 vs. WT+VO, †† P < 0.01 vs. WT+VO, analyzed by one-way ANOVA followed by post hoc Tukey’s test. (DOCX) [file pone.0119687.s009.docx]

**Supporting Information S2 Table**

**S2 Table. Hemodynamic measurement at 8 weeks after creating arteriovenous fistula (AVF).**

TFAM, human mitochondrial transcription factor A-transgenic mice; TW, Twinkle-transgenic mice; WT, wild type mice; VO, volume overload; Sham, sham-operated; HR, heart rate; mAoP, mean aortic pressure; LVEDP, left ventricular end diastolic pressure. Data are expressed as mean ± SEM. **P* <0.05 vs. WT+Sham, ***P* <0.01 vs. WT+Sham, †*P* <0.01 vs. WT+VO, ††*P* <0.01 vs. WT+VO, analyzed by one-way ANOVA followed by post hoc Tukey’s test.
